# Supplementary material
Source: publisher site journal article supplement (https://oneecosystem.pensoft.net/article/download/suppl/6886587/)
Supplement: Supplementary file 1

**Appendix Table A3**

**Table A3.** Article 17 2019 reporting for the 24 Annex I habitats in the Dargle catchment showing national level conservation status and trends. For more detail see <https://www.npws.ie/publications/article-17-reports>

| **NPWS Habitat Grouping** | **Habitat** | **Natura 2000 Code** | **Status 2019** | **Trend 2019** |
| --- | --- | --- | --- | --- |
| Coastal | Tidal Mudflats and Sandflats | 1140 | Inadequate | Declining |
|  | Drift Lines | 1210 | Inadequate | Declining |
|  | Perennial Vegetation of Stony Banks | 1220 | Inadequate | No change |
|  | Sandbanks | 1110 | Favourable | No change |
|  | Vegetated Sea Cliffs | 1230 | Inadequate | No change |
| Dunes | Embryonic Shifting Dunes | 2110 | Inadequate | No change |
|  | Marram Dunes (White Dunes) | 2120 | Inadequate | No change |
|  | Fixed Dunes (Grey Dunes) | 2130 | Bad | Declining |
| Freshwater | Oligotrophic Isoetid Lake Habitat | 3110 | Bad | No change |
|  | Acid Oligotrophic Lake Habitat | 3160 | Inadequate | No change |
|  | Vegetation of Flowing Waters | 3260 | Inadequate | Declining |
| Heath and Scrub | Wet Heath | 4010 | Bad | Declining |
|  | Dry Heath | 4030 | Bad | No change |
|  | Alpine and Subalpine Heaths | 4060 | Bad | Improving |
| Grasslands | Calaminarian Grassland | 6130 | Inadequate | Declining |
|  | Species-Rich Nardus Upland Grassland | 6230 | Bad | Declining |
| Bogs, Mires and Fens | Blanket Bog (Active) | 7130 | Bad | Declining |
|  | Transition Mires | 7140 | Bad | No change |
|  | Petrifying Springs | 7220 | Inadequate | Declining |
|  | Alkaline Fens | 7230 | Bad | Declining |
| Rocky Habitats | *Siliceous Scree | 8110 | Inadequate | No change |
|  | *Siliceous Rocky Slopes | 8220 | Inadequate | No change |
| Forests | Old Oak Woodlands | 91A0 | Bad | Declining |
|  | Residual Alluvial Forests | 91 E0 | Bad | Declining |
